# Supplementary material
Source: publisher figshare collection journal article supplement (https://gsapubs.figshare.com/ndownloader/files/23299307)
Supplement: Supplementary file 1 [file 23299307]

TABLE DR1. CONTEXTS OF GEOLOGICAL AND ARCHAEOLOGICAL TURQUOISE SAMPLES

| Sample ID                             | MNA*, NMBGMR† or<br>ARI§ catalog number<br>(If applicable) | Sample Collection Notes                                           |
|---------------------------------------|------------------------------------------------------------|-------------------------------------------------------------------|
| <u>Mineral Park District, AZ</u>      |                                                            |                                                                   |
| <i>Ithaca Peak</i>                    |                                                            |                                                                   |
| MP-1                                  | NA20939.1                                                  |                                                                   |
| MP-2                                  | NA20939.1                                                  |                                                                   |
| MP-3                                  | NA20939.1                                                  |                                                                   |
| MP-4                                  | NA20939.1                                                  |                                                                   |
| MP-5                                  | NA20939.1                                                  |                                                                   |
| <i>Turquoise Mountain</i>             |                                                            |                                                                   |
| MP-6                                  | NA20838.1                                                  |                                                                   |
| MP-7                                  | NA20838.1                                                  |                                                                   |
| MP-8                                  | NA20838.1                                                  |                                                                   |
| <i>Other locations</i>                |                                                            |                                                                   |
| MP-9                                  | NA20837.1                                                  | Specific locality unclear. Possibly a mine on Turquoise Mountain. |
| MP-10                                 | NA20837.1                                                  | Specific locality unclear. Possibly a mine on Turquoise Mountain. |
| MP-11                                 | NA20837.1                                                  | Specific locality unclear. Possibly a mine on Turquoise Mountain. |
| <u>Halloran Springs, CA</u>           |                                                            |                                                                   |
| HS-1                                  | N.A. <sup>#</sup>                                          | "El Producto Mine," West Camp, collected November 18, 2009        |
| HS-2                                  | N.A.                                                       | "El Producto Mine," West Camp, collected November 18, 2009        |
| HS-3                                  | N.A.                                                       | "New Monster Mine" West Camp, collected November 18, 2009         |
| HS-4                                  | NA20896.1                                                  |                                                                   |
| HS-5                                  | N.A.                                                       | East Camp, collected November 17, 2009                            |
| HS-6                                  | N.A.                                                       | East Camp, collected November 17, 2009                            |
| HS-7                                  | N.A.                                                       | East Camp, collected November 17, 2009                            |
| HS-8                                  | N.A.                                                       | East Camp, collected November 17, 2009                            |
| HS-9*                                 | NA20906.1                                                  |                                                                   |
| HS-10                                 | NA20897.1                                                  |                                                                   |
| HS-11                                 | NA20899.1                                                  |                                                                   |
| <u>Crescent Peak, NV</u>              |                                                            |                                                                   |
| CR-1                                  | NA20842.1                                                  |                                                                   |
| CR-2                                  | NA20842.1                                                  |                                                                   |
| CR-3                                  | NA20843.1                                                  |                                                                   |
| CR-4                                  | NA20843.1                                                  |                                                                   |
| CR-5                                  | NA20846.1                                                  |                                                                   |
| CR-6                                  | NA20846.1                                                  |                                                                   |
| CR-7                                  | NA20846.1                                                  |                                                                   |
| CR-8                                  | NA20846.1                                                  |                                                                   |
| CR-9                                  | NA20847.1                                                  |                                                                   |
| CR-10                                 | NA20847.1                                                  |                                                                   |
| CR-11a                                | NA20847.1                                                  |                                                                   |
| CR-11b                                | NA20847.1                                                  | Same sample powder as CR-11a                                      |
| CR-12                                 | N.A.                                                       | Sample provided by D. Hendricks and B. Cranks                     |
| <u>Courtland-Gleeson District, AZ</u> |                                                            |                                                                   |
| <i>Courtland</i>                      |                                                            |                                                                   |
| CT-1                                  | NA20855.1                                                  |                                                                   |
| CT-2                                  | NA20855.1                                                  |                                                                   |
| CT-3                                  | NA20855.1                                                  |                                                                   |
| CT-4                                  | NA20859.1                                                  |                                                                   |
| CT-5                                  | NA20859.1                                                  |                                                                   |
| CT-6                                  | NA20859.1                                                  |                                                                   |
| CT-7                                  | NA20859.1                                                  |                                                                   |
| CT-8                                  | NA20859.1                                                  |                                                                   |
| CT-9                                  | NA20860.1                                                  |                                                                   |
| CT-10                                 | NA20860.1                                                  |                                                                   |
| CT-11                                 | NA20860.1                                                  |                                                                   |
| <i>Gleeson</i>                        |                                                            |                                                                   |
| G1                                    | NA20862.1                                                  |                                                                   |
| G2                                    | NA20862.1                                                  |                                                                   |
| G3                                    | NA20863.1                                                  |                                                                   |
| G4                                    | NA20863.1                                                  |                                                                   |
| G5                                    | N.A.                                                       | Surface collection, 2005                                          |

# DR2015201

## Cananea District, Sonora, Mexico

|      |        |
|------|--------|
| CN-1 | A14263 |
| CN-2 | A14265 |

## Eukrea District, NM

|       |           |
|-------|-----------|
| OH-1  | NA20866.1 |
| OH-2  | NA20866.1 |
| OH-3  | NA20866.1 |
| OH-4  | NA20866.1 |
| OH-5  | NA20871.1 |
| OH-6  | NA20874.1 |
| OH-7  | NA20874.1 |
| OH-8  | NA20876.1 |
| OH-9  | NA20877.1 |
| OH-10 | NA20877.1 |

## Tyrone District, NM

|      |              |                                                   |
|------|--------------|---------------------------------------------------|
| T-1a | N.A.         | Sample provided by V. Lueth                       |
| T-1b | N.A.         | Same sample powder as T-1a                        |
| T-2  | N.A.         | Sample provided by V. Lueth                       |
| T-3  | NMBGMR #843, | Location described as "Burro Mountains District"  |
| T-4  | NMBGMR #843  | Fragment from same hand sample as analyzed in T-3 |

## White Signal District, NM

|      |      |                                            |
|------|------|--------------------------------------------|
| RH-1 | N.A. | Red Hill Mine. Sample provided by R. Gibbs |
| RH-2 | N.A. | Red Hill Mine. Sample provided by R. Gibbs |

## Morenci District, AZ

|     |        |
|-----|--------|
| M-1 | A14251 |
| M-2 | A14251 |
| M-3 | A14251 |

## Castle Dome Mine, AZ

|      |      |                                |
|------|------|--------------------------------|
| CD-1 | N.A. | Sample provided by A. Anderson |
|------|------|--------------------------------|

## Sleeping Beauty Mine

|      |           |                                  |
|------|-----------|----------------------------------|
| SB-1 | A14238    |                                  |
| SB-2 | NA20954.1 |                                  |
| SB-3 | A24241    |                                  |
| SB-4 | A14240    |                                  |
| SB-5 | N.A.      | Collected at mine, May 19, 2009  |
| SB-6 | N.A.      | Sample provided by D. Covoursier |
| SB-7 | N.A.      | Collected at mine, May 19, 2009  |
| SB-8 | N.A.      | Sample provided by D. Covoursier |
| SB-9 | N.A.      | Sample provided by D. Covoursier |

## Canyon Creek, AZ

|      |      |                                                                                                         |
|------|------|---------------------------------------------------------------------------------------------------------|
| CC-1 | N.A. | North quarry, sample provided by J. Welch                                                               |
| CC-2 | N.A. | North quarry, sample provided by J. Welch                                                               |
| CC-3 | N.A. | North quarry, sample provided by J. Welch                                                               |
| CC-4 | N.A. | North quarry, collected January 22, 2011                                                                |
| CC-5 | N.A. | North quarry, collected January 22, 2011                                                                |
| CC-6 | N.A. | North quarry, collected January 22, 2011                                                                |
| CC-7 | N.A. | North quarry, collected January 22, 2011                                                                |
| CC-8 | N.A. | South quarry, collected January 22, 2011                                                                |
| CC-9 | N.A. | Locus #3, collected January 22, 2011. This is the "rock shelter" described in Triadan and Welch (1991). |

## Cerrillos Hills district

### Mt. Chalchihuitl

|     |           |                                                       |
|-----|-----------|-------------------------------------------------------|
| C-1 | N.A.      | Great Pit, Mt Chalchihuitl, collected May 29, 2008    |
| C-2 | N.A.      | Great Pit, Mt Chalchihuitl, collected May 29, 2008    |
| C-3 | N.A.      | Great Pit, Mt Chalchihuitl, collected May 29, 2008    |
| C-4 | N.A.      | Mt. Chalchihuitl, Western Pit, collected May 29, 2008 |
| C-5 | NA20882.1 |                                                       |
| C-6 | NA20883.1 |                                                       |
| C-7 | NA20884.1 |                                                       |
| C-8 | NA20885.1 |                                                       |
| C-9 | NA20886.1 |                                                       |

### Turquoise Hill

|      |           |
|------|-----------|
| C-10 | NA20892.1 |
|------|-----------|

# DR2015201

|                                        |                     |                                                         |
|----------------------------------------|---------------------|---------------------------------------------------------|
| C-11                                   | NA20893.1           |                                                         |
| C-12                                   | N.A.                | Main Castillain Mine, collected May, 31, 2008           |
| C-13                                   | N.A.                | Main Castillain Mine, collected May, 31, 2008           |
| C-14                                   | N.A.                | Main Castillain Mine, collected May, 31, 2008           |
| C-15                                   | N.A.                | Main Castillain Mine, collected May, 31, 2008           |
| C-16                                   | N.A.                | Main Castillain Mine, collected May, 31, 2008           |
| C-17                                   | N.A.                | Main Castillain Mine, collected May, 31, 2008           |
| C-18                                   | N.A.                | Lower Castillian Mine, collected May, 31, 2008          |
| C-19                                   | N.A.                | Tiffany Pit, collected May, 31, 2008                    |
| C-20                                   | N.A.                | Mahoney Mine, collected May 31, 2008                    |
| <i>Other locations</i>                 |                     |                                                         |
| C-21                                   | N.A.                | Business District, collected February 2008              |
| C-22                                   | N.A.                | Business District, collected February 2008              |
| C-23                                   | N.A.                | Cerrillos Hills, collected August 28, 2010              |
| <u>Orogrande District, NM</u>          |                     |                                                         |
| OR-1                                   | NA20911.1           |                                                         |
| OR-2                                   | NA20911.1           |                                                         |
| OR-3                                   | NA20913.1           |                                                         |
| OR-4                                   | NA20914.1           |                                                         |
| OR-5                                   | NA20918.1           |                                                         |
| OR-6                                   | NA20918.1           |                                                         |
| OR-7a                                  | NA20919.1           |                                                         |
| OR-7b                                  | NA20919.1           | Same powder as analyzed in OR-7a                        |
| OR-8                                   |                     | Iron Mask Mine; Sample provided by Virgil Lueth,        |
| <u>Manassa, CO</u>                     |                     |                                                         |
| KM-1                                   | A14242              | King Mine                                               |
| KM-2                                   | A14242              | King Mine                                               |
| KM-3                                   | A14243              | King Mine                                               |
| KM-4                                   | A14243              | King Mine                                               |
| KM-5                                   | A14245              | King Mine                                               |
| KM-6                                   | A14245              | King Mine                                               |
| KM-7                                   | A14246              | King Mine                                               |
| <u>Villa Grove, CO</u>                 |                     |                                                         |
| VG1                                    | N.A.                | Hall Mine; Sample provided by P. Modreski               |
| VG2                                    | N.A.                | Hall Mine; Sample provided by P. Modreski               |
| <u>Cripple Creek, CO</u>               |                     |                                                         |
| CPC-1                                  | N.A.                | Florence Turquoise Mine; Sample provided by P. Modreski |
| <u>Leadville, CO</u>                   |                     |                                                         |
| L1                                     | N.A.                | Turquoise Chief Mine; Sample provided by P. Modreski    |
| <u>Royston district</u>                |                     |                                                         |
| RY-1                                   | NA20942.1           |                                                         |
| RY-2                                   | NA20942.1           |                                                         |
| RY-3                                   | NA20948.1           |                                                         |
| RY-4                                   | NA20948.1           |                                                         |
| RY-5                                   | NA20947.1           |                                                         |
| RY-6                                   | NA20947.1           |                                                         |
| <u>Cienega Site (LA-425)</u>           |                     |                                                         |
| CS-1                                   | ARI 2004.002.12547  | Pendant, nearly complete                                |
| CS-2                                   | ARI 2004.002.12507  | Ornament fragment (original form indeterminate)         |
| CS-3                                   | ARI 2004.002.12497  | Bead, complete                                          |
| CS-4                                   | ARI 2004.002.12496  | Bead, complete                                          |
| CS-5                                   | ARI 2004.002.12510  | Amorphous fragment, minimally worked                    |
| <u>Mirabal Ruin (LA-426)</u>           |                     |                                                         |
| MR-1                                   | ARI 2004.002.12576  | Tabular ornament, possible pendant blank                |
| MR-2                                   | ARI 2004.002.12611a | Pendant fragment                                        |
| MR-3                                   | ARI 2004.002.12611b | Bead fragment                                           |
| <u>Pueblo de los Muertos (LA-1585)</u> |                     |                                                         |
| PM-1                                   | ARI 2004.002.12667  | Amorphous fragment, minimally worked                    |
| PM-2                                   | ARI 2004.002.12677  | Amorphous fragment, minimally worked                    |

DR2015201

*Note:* All catalog numbers with an NA- or A- prefix come from the Museum of Northern Arizona (Flagstaff, Arizona) and are part of the turquoise collection donated by Phil C. Weigand. All catalog numbers with a NMBGMR prefix come from the Mineral Museum at the New Mexico Bureau of Geology and Mineral Resources, Socorro, New Mexico. All numbers with an ARI prefix are from the Archaeological Research Institute at Arizona State University, Tempe, Arizona.

\*Museum of Northern Arizona

†New Mexico Bureau of Geology and Mineral Resources

§Archaeological Research Institute

#Not Applicable

---
